# Supplementary material for: Characterizing source fingerprints and ageing processes in laboratory-generated secondary organic aerosols using proton-nuclear magnetic resonance ( 1 H-NMR) analysis and HPLC HULIS determination
Source: Copernicus journal article supplement (doi:10.5194/acp-2017-91), 2017-02-13
Supplement: Supplementary file 1 [file acp-2017-91-supplement.pdf]

## Supplement

# Characterizing source fingerprints and ageing processes in laboratory-generated secondary organic aerosols using proton-nuclear magnetic resonance (<sup>1</sup>H-NMR) analysis and HPLC HULIS determination.

Zanca, N.<sup>1,5</sup>, A. T. Lambe<sup>2,3</sup>, P. Massoli<sup>2</sup>, M. Paglione<sup>1</sup>, D. R. Croasdale<sup>3</sup>, Y. Parmar<sup>3</sup>, E. Tagliavini<sup>4</sup>, S. Gilardoni<sup>1</sup>, S. Decesari<sup>1</sup>

10 <sup>1</sup>Institute of Atmospheric Sciences and Climate (ISAC) of the National Research Council of Italy (CNR), Bologna, 40129, Italy.

<sup>2</sup>Aerodyne Research Inc., Billerica, MA 01821, USA.

<sup>3</sup>Chemistry Department, Boston College, Chestnut Hill, MA 02467, USA.

<sup>4</sup>Department of Chemistry "Giacomo Ciamician", University of Bologna, Bologna, 40126, Italy.

15 <sup>5</sup>Proambiente S.c.r.l., Bologna, 40129, Italy.

*Corresponding author: Nicola Zanca (n.zanca@consorzioproambiente.it)*

### Content:

- 20
- Supporting information on source and nature of ambient OA samples.
  - NMR spectroscopic data for non-aqueous components of isoprene SOA.
  - HPLC fraction distributions for all  $\alpha$ -pinene and naphthalene SOA samples.

## Origin of ambient samples

The Po Valley samples discussed in Section 4 were collected in San Pietro Capofiume (SPC), a rural site located in the south-eastern sector of the Valley, during the PEGASOS campaign of summer 2012 (Rosati et al., Atmos. Chem. Phys., 16, 7295-7315, 2016). Aerosol particles with ambient aerodynamic diameter  $< 1 \mu\text{m}$  were sampled on pre-washed and pre-baked quartz-fiber filters (Whatman, 9 cm size) using a high-volume sampler (model Echo Hivol, Tecora) at a constant nominal flow of 500 l/min located at ground level. Two filters per day were sampled (change at 9 AM and 6 PM local time). Each filter was extracted with 5mL of deionized ultra-pure water (Milli-Q) in a mechanical shaker for 1 hour and the water extract was filtered on PTFE membranes (pore size: 0.45  $\mu\text{m}$ ) in order to remove suspended particles. The water extracts were dried by rotary evaporator and were then re-dissolved in 2.15mL of  $\text{D}_2\text{O}$ . An aliquot (0.65mL) was used for proton-nuclear magnetic resonance ( $^1\text{H-NMR}$ ) characterization, while a second aliquot (1.5mL) was kept for HPLC analysis and total organic carbon (TOC) analysis. The NMR aliquot was mixed with sodium 3-trimethylsilyl-(2,2,3,3- $\text{d}_4$ ) propionate (TSP- $\text{d}_4$ ) as internal standard, and with a buffer of potassium formate/formic acid (pH~3.8). The  $^1\text{H-NMR}$  spectra were acquired at 600MHz with a Varian 600 spectrometer in a 5mm probe. The sample SPC\_020712\_D was used for comparison with the spectroscopic data of the SOA samples (Figure 7 of the manuscript). The  $^1\text{H-NMR}$  spectrum of sample SPC\_020712\_D is shown in Figure S1.

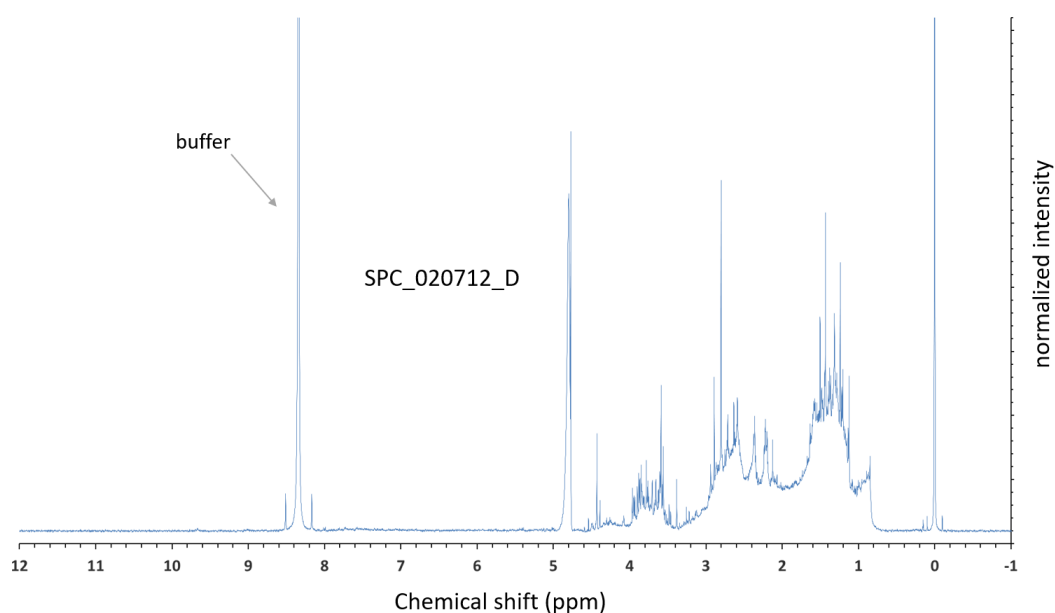

**Figure S1.**  $^1\text{H-NMR}$  spectrum of sample SPC\_020712\_D (after water-extraction) collected in San Pietro Capofiume, a rural site nearby Bologna. Sampling time was 9:00-20:30 (local time).

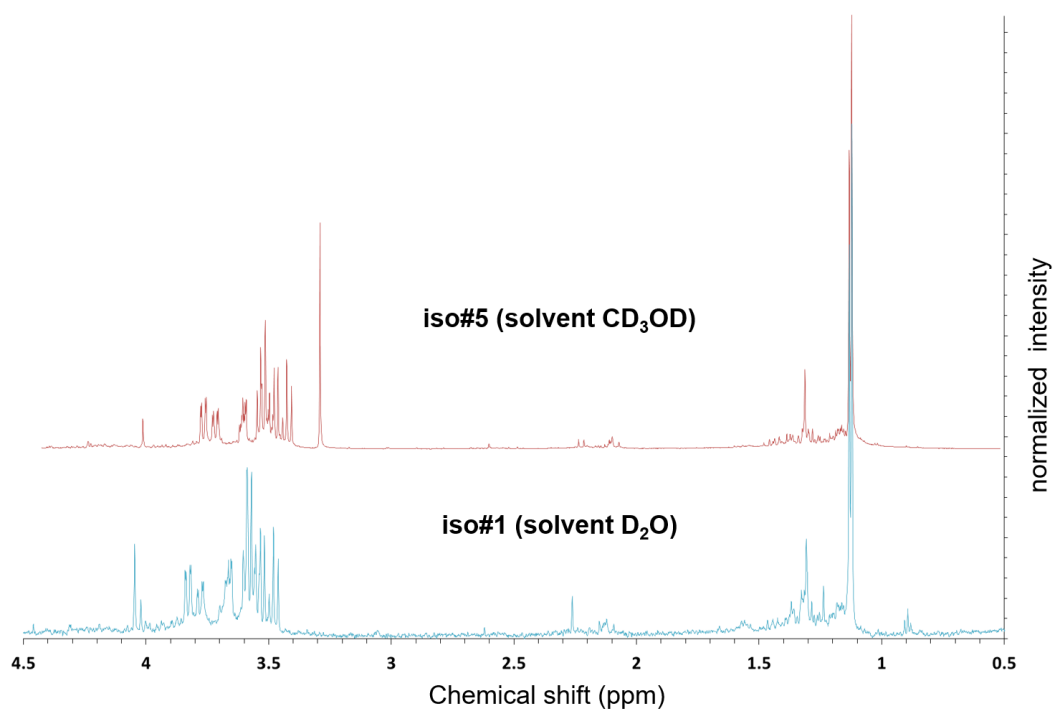

Figure S2. H-NMR spectra (600 MHz) of two isoprene SOA generated with the PAM flow reactor, iso#1 (H-NMR solvent: D<sub>2</sub>O) and iso#5 (H-NMR solvent: CD<sub>3</sub>OD) samples.

5

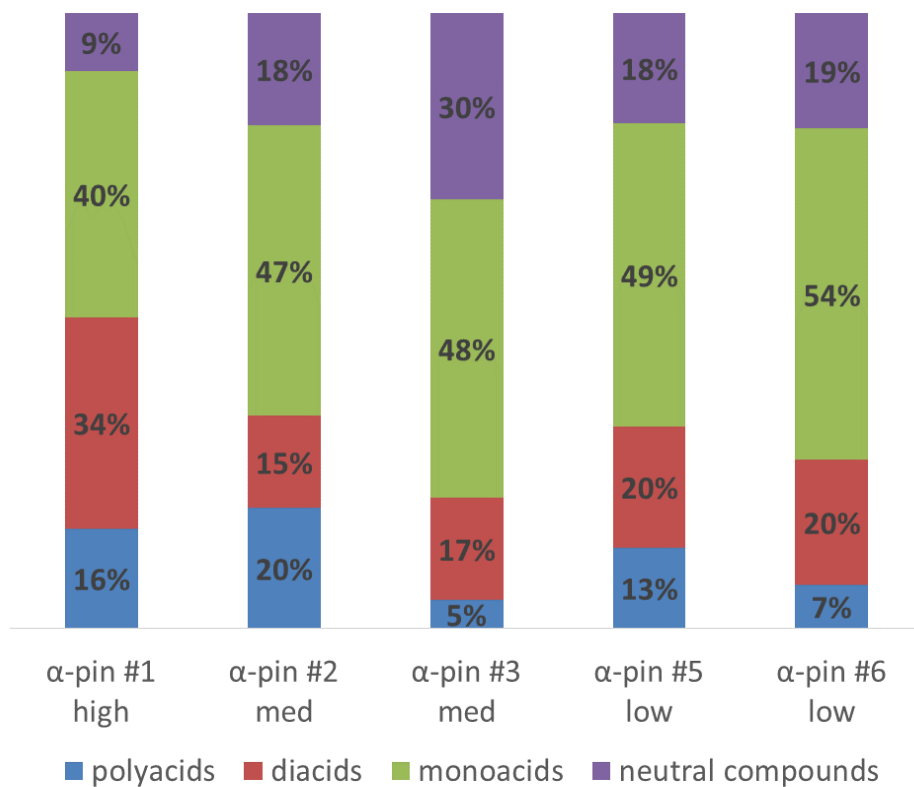

Figure S3. WSOC fractions analyzed by HPLC-TOC for various  $\alpha$ -pinene SOA samples generated with the PAM.

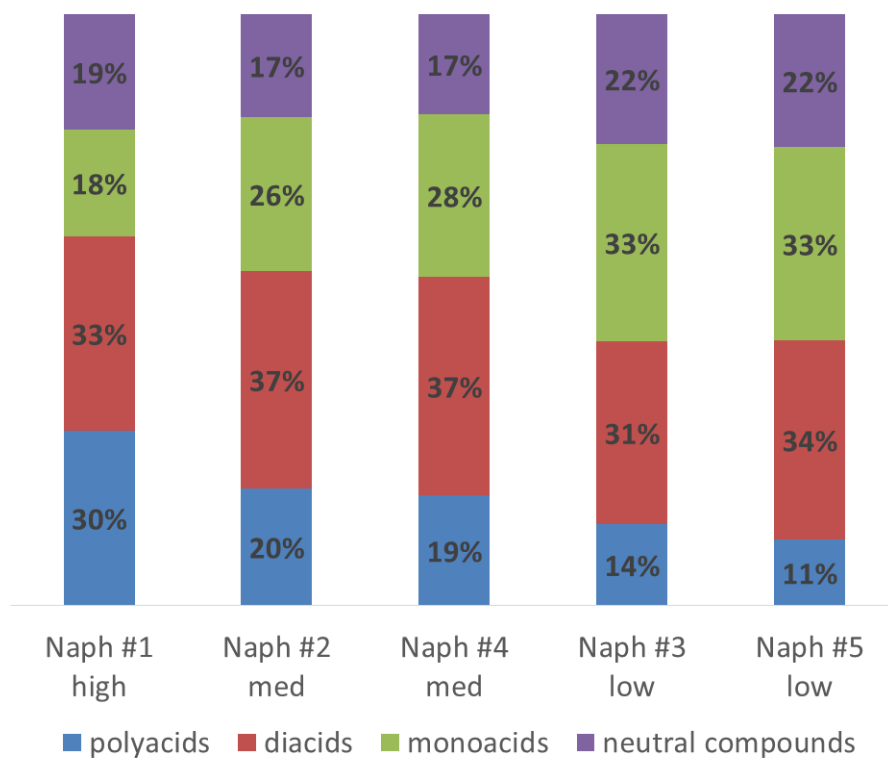

Figure S4. WSOC fractions analyzed by HPLC-TOC for various naphthalene SOA samples generated with the PAM.
